# Supplementary material for: Shortening telomere is associated with subclinical atherosclerosis biomarker in omnivorous but not in vegetarian healthy men
Source: publisher site journal article supplement (doi:10.18632/aging.102098), 2019-07-19
Supplement: Supplementary file [file aging-v11i14-102098-supplementary-material-SD1.pdf]

SUPPLEMENTARY MATERIAL

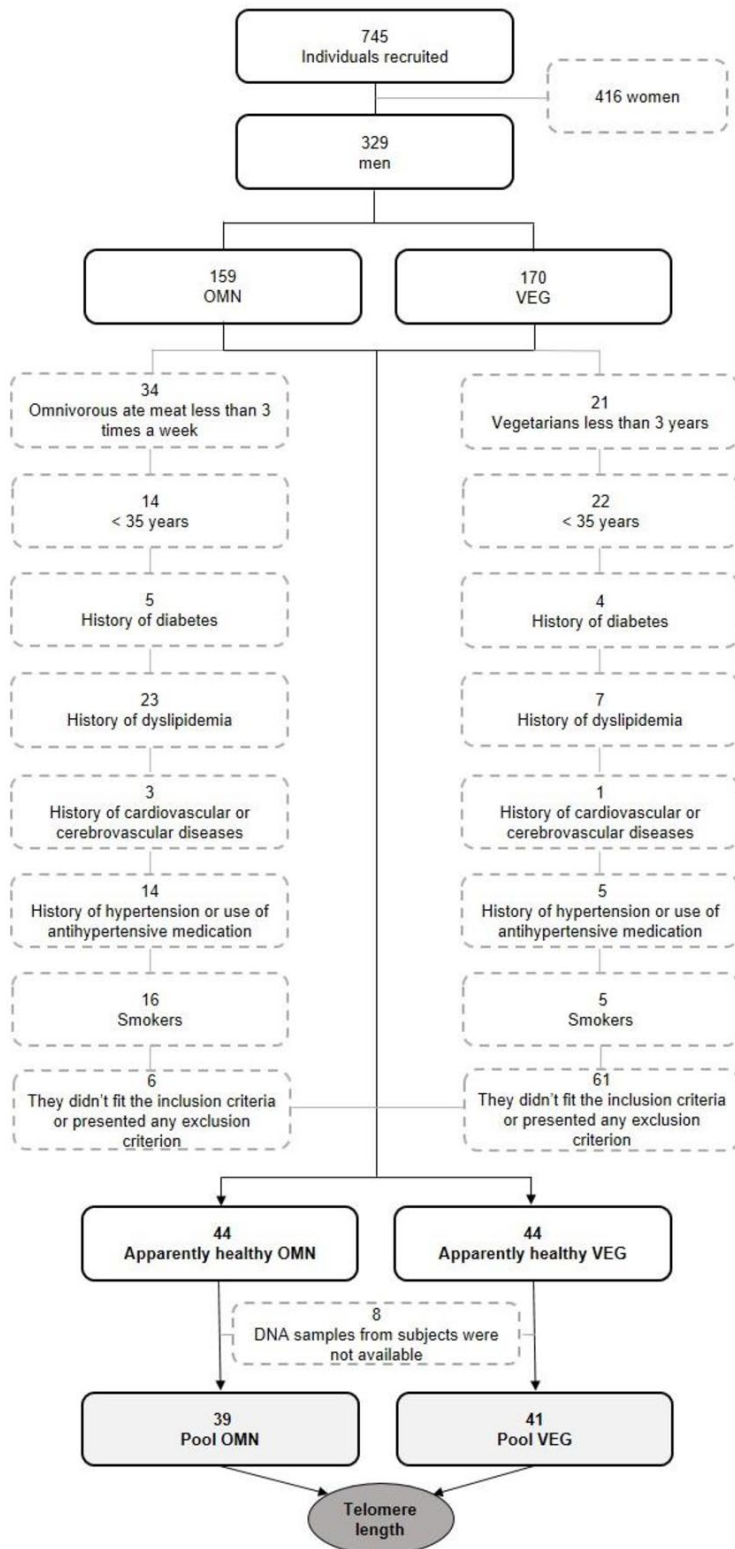

Figure S1. Experimental design and samples.
